# Supplementary material for: High-Capacity Adenoviral Vectors Permit Robust and Versatile Testing of DMD Gene Repair Tools and Strategies in Human Cells
Source: PubMed Central journal article supplement (PMC7226760; doi:10.3390/cells9040869), 2020-04-02
Supplement: cells-09-00869-s001.pdf [file cells-09-00869-s001.pdf]

## **Supplementary Materials**

**Supplementary Table S1.** Oligonucleotides used for optimized gRNA assembly and corresponding target sites.

| gRNA  | Oligonucleotide Code | Oligonucleotide Sequence (5' → 3') | Target Site Sequence (5' → 3'), PAM Underlined | Target Site Region |
|-------|----------------------|------------------------------------|------------------------------------------------|--------------------|
| gEX51 | # 83                 | ACCGACCAGAGTAACAGTCTGAGT           | ACCAGAGTAACAGTCTGAGT <u>AGG</u>                | Exon 51            |
|       | # 84                 | AAACACTCAGACTGTTACTCTGGT           |                                                |                    |
| gIN43 | # 99                 | ACCGTTACATACAGGCTAGGGAG            | GTTACATACAGGCTAGGGAG <u>TGG</u>                | Intron 43          |
|       | # 100                | AAACCTGCCTAGCCTGTATGTAA            |                                                |                    |
| gIN54 | # 105                | ACCGGTACACAATAGGTACGGAA            | GGTACACAATAGGTACGGAA <u>TGG</u>                | Intron 54          |
|       | # 106                | AAACTTCCGTACCTATTGTGTAC            |                                                |                    |

**Supplementary Table S2.** Primer pairs and composition for qPCR mixtures used for the quantification of genomic deletions.

| Target Site                           | Primer Code | Primers (5' → 3')             | iQ SYBR Green Supermix | Amplicon Size |
|---------------------------------------|-------------|-------------------------------|------------------------|---------------|
| Intronic junction $\Delta$ 44-54      | # 1186      | TGGTGTTCATCCTGGAAGTGC (150nM) | 1×                     | 99 bp         |
|                                       | # 1189      | TCCACATGCCTACCAACATCT (150nM) |                        |               |
| Internal control <i>DMD</i> intron 43 | # 1198      | TCCCAGCACTTTGAGAGACC (150nM)  | 1×                     | 75 bp         |
|                                       | # 1199      | TCCATGTTGCTCAGTCTGGT (150nM)  |                        |               |

**Supplementary Table S3.** qPCR cycling parameters used for the quantification of genomic deletions.

| Target                                | Denaturation | Amplification |                                  |    | # Cycles                            | Melt Curve Analysis |
|---------------------------------------|--------------|---------------|----------------------------------|----|-------------------------------------|---------------------|
|                                       |              | Denaturation  | Annealing/Extension + Plate Read |    |                                     |                     |
| Intronic junction $\Delta$ 44-54      | 95 °C        | 95 °C         | 65 °C                            | 40 | 55 to 95 °C (0.5 °C increment/step) |                     |
|                                       | 5 min        | 10 sec        | 30 sec                           |    |                                     |                     |
| Internal control <i>DMD</i> intron 43 | 95 °C        | 95 °C         | 65.5 °C                          | 35 | 55 to 95 °C (0.5 °C increment/step) |                     |
|                                       | 5 min        | 10 sec        | 30 sec                           |    |                                     |                     |



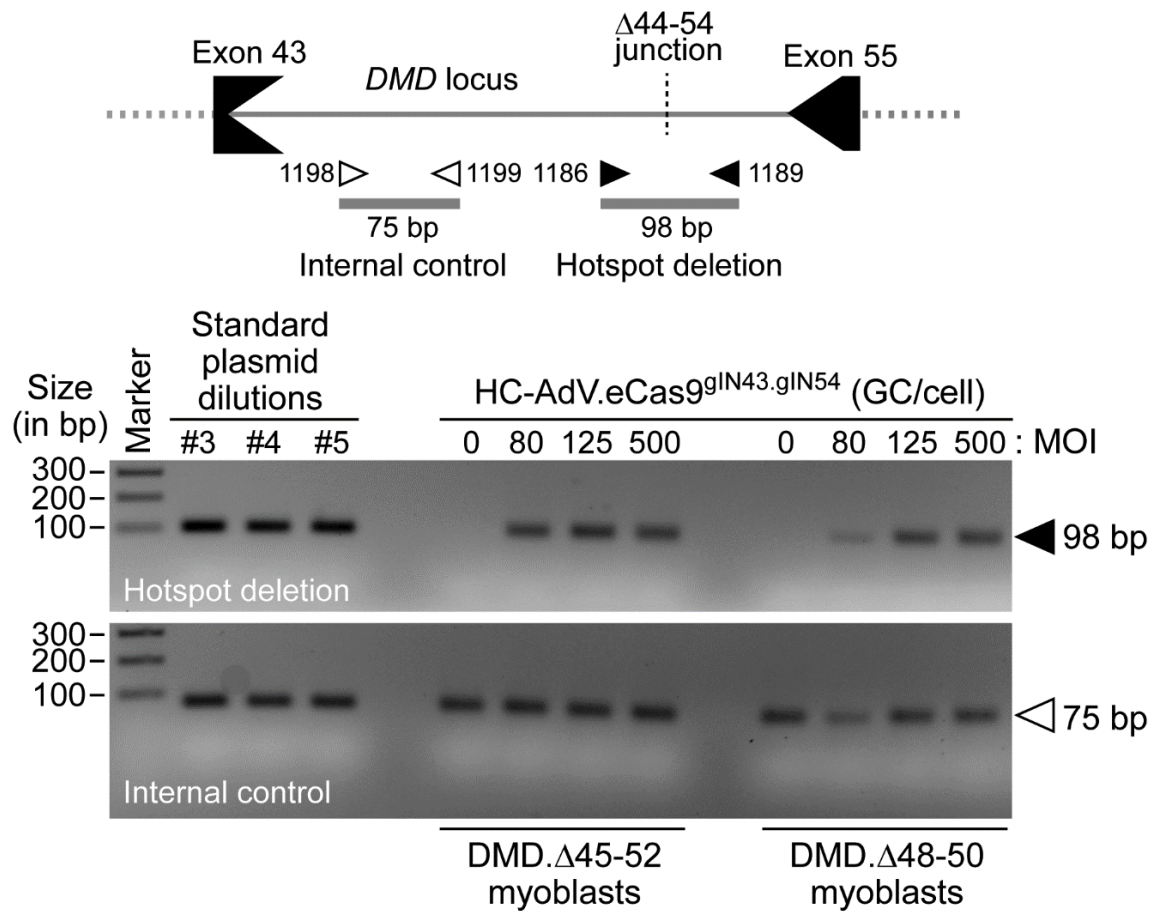

**Supplementary Figure S1.** Quality control of qPCR amplicons used for quantifying long-range genomic deletions induced by dual RGN-encoding HC-AdV particles. The qPCR assays were performed on genomic DNA from DMD.Δ45-52 and DMD.Δ48-50 myoblasts transduced with the “all-in-one” vector HC-AdV.eCas9<sup>gIN43.gIN54</sup> at the indicated multiplicities-of-infection (MOI). At 3 days post-transduction vector-transduced cells were sub-cultured and total cellular DNA was isolated at 7 days post-transduction for qPCR analyses. Mock-transduced cells provided for negative controls. qPCR products specific for the deletion encompassing *DMD* exons 44 through 54 (hotspot deletion) and intron 43 (internal control) are marked by open and solid arrowheads, respectively. Amplicons resulting from three serial dilutions of the standard plasmids AV24\_jDEL.I43-I54 and AL05\_pDMD, containing hotspot deletion and internal control target sequences, respectively, were taken along to confirm the size and specificity of the respective qPCR products generated *in cellula*. Serial dilutions #3, #4 and #5 of plasmid AV24\_jDEL.I43-I54 correspond to  $2.26 \times 10^5$ ,  $2.26 \times 10^4$  and  $2.26 \times 10^3$  DNA copies, respectively. Serial dilutions #3, #4 and #5 of plasmid AL05\_pDMD correspond to  $7.56 \times 10^5$ ,  $7.56 \times 10^4$  and  $7.56 \times 10^3$  DNA copies, respectively. Marker, GeneRuler DNA Ladder molecular weight mix (Fermentas).

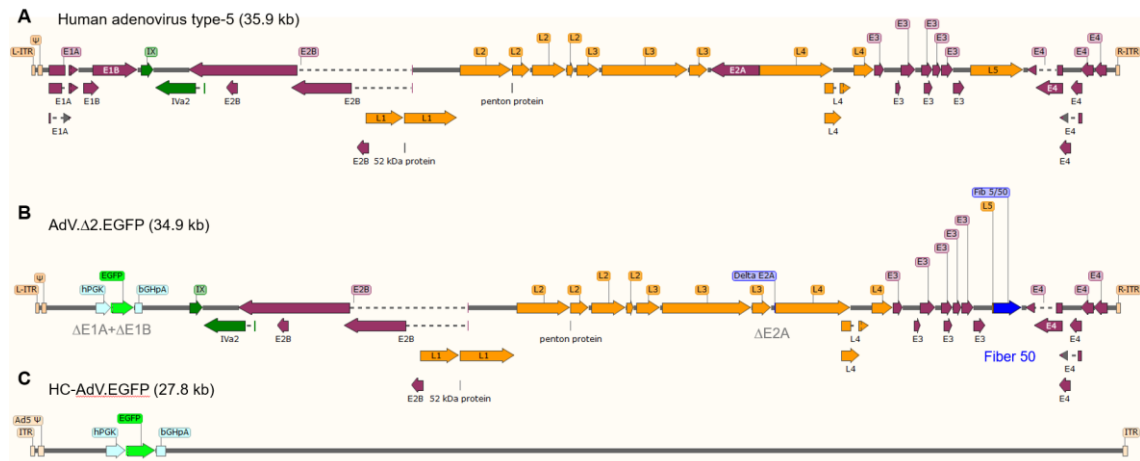

**Supplementary Figure S2. Diagrammatic representation of wild-type and recombinant adenoviruses.**

Genome organization of the prototypic human adenovirus type-5 (A) drawn in relation to that of the second-generation adenoviral vector AdV.Δ2.EGFP (B) and to that of the high-capacity adenoviral vector HC-AdV.EGFP (C). The vectors encode the same expression unit consisting of the EGFP open reading frame under the transcriptional control of the human *PGK1* promoter (hPGK) and the bovine *GH1* polyadenylation signal (bGHpA). The vector particles are tropism modified as they display chimeric fibers consisting of basal shaft sequences from adenovirus type-5 fused to the apical shaft and knob domains from the CD46-interacting adenovirus type-50. The non-coding cis-acting elements: inverted terminal repeats (ITR) and packaging signal ( $\Psi$ ), necessary for DNA replication and encapsidation, respectively, are indicated. Regulatory functions involved in the activation of the viral gene expression program (magenta arrows) are encoded by the early (E) regions *E1A*, *E1B*, *E2A*, *E3* and *E4*; Structural proteins (orange arrows) necessary for the assembly of mature virions are encoded by the late (L) regions *L1* through *L5*, with *L5* yielding the cell receptor-interacting fibers. Products from reading frames encoding the intermediate proteins IX and IVa2 are also depicted (green arrows). Second-generation AdVs are deleted in *E2A* and/or *E4* and, hence, are produced in the respective complementing packaging cell lines. HC-AdVs (a.k.a. “gutless”, helper-dependent or third-generation AdVs) are devoid of all trans-acting coding sequences retain only the cis-acting inverted terminal repeats and packaging signal. As a result, HC-AdVs are generated in *E1*-complementing cell lines in the presence of a first-generation AdV. This so-called helper AdV provides in trans all the viral gene products required for assembling HC-AdV particles. The packaging signal of the helper is flanked by recognition sequences for a site-specific recombinase (e.g. Cre or FLP) that renders its genome unpackageable in recombinase-expressing and *E1*-complementing producer cells. Diagrams were assembled with the aid of SnapGene version 4.3.10. The human adenovirus type-5 source sequence was retrieved from GenBank accession number: AY601635.1.

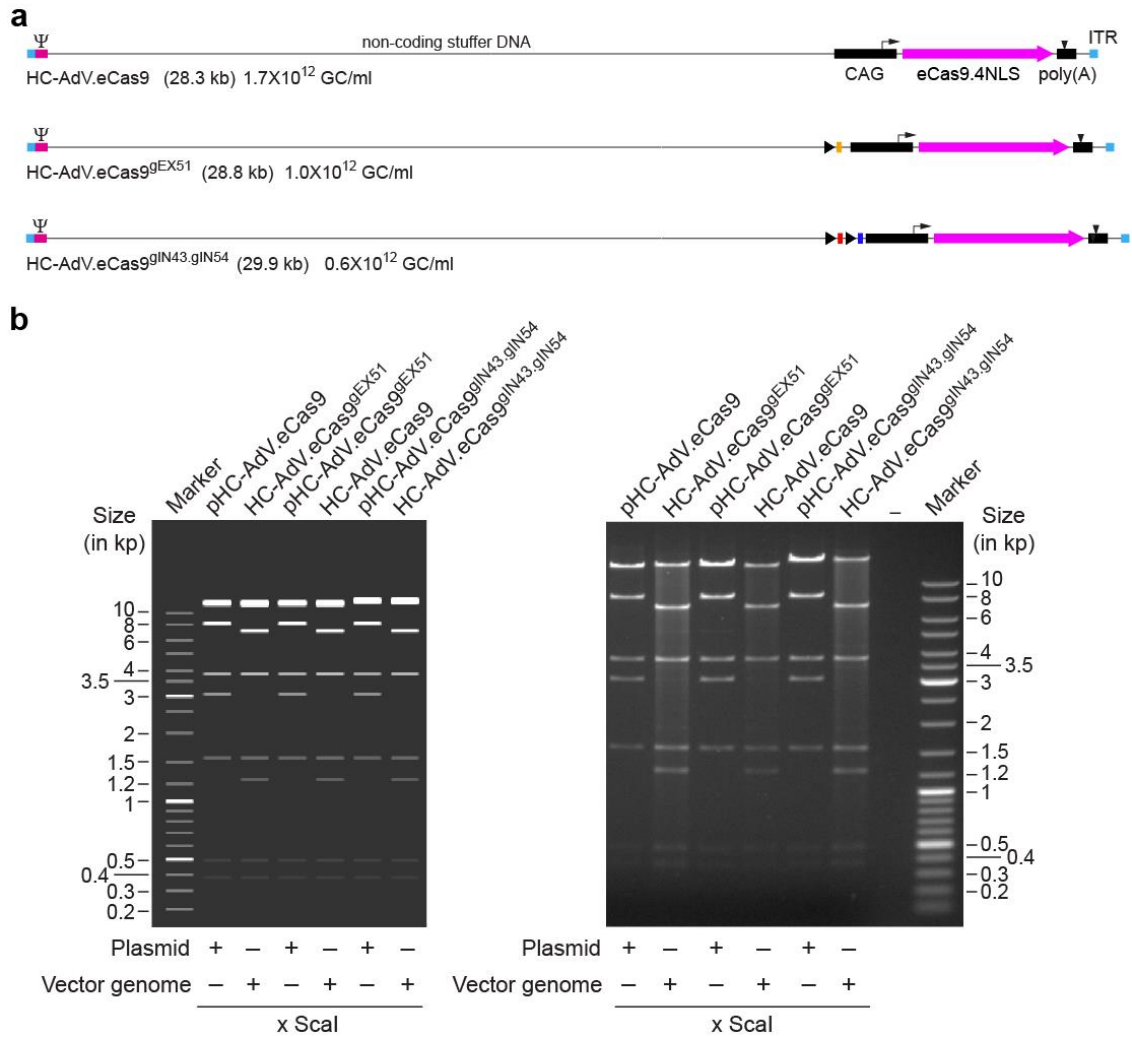

**Supplementary Figure S3. Structural analysis of eCas9.4NLS-encoding HC-AdV genomes.** (A) Schematics of the genome structure of control and *DMD*-targeting HC-AdVs. The high-specificity eCas9.4NLS nuclease is under the transcriptional control of the hybrid CAG promoter and the rabbit  $\beta$ -globin polyadenylation signal. Horizontal arrowheads, human *U6* promoters driving expression of optimized gRNAs opt-gRNA<sup>gEX51</sup>, opt-gRNA<sup>IN43</sup> and opt-gRNA<sup>IN54</sup>, marked as orange, red and blue boxes, respectively. HC-AdV.eCas9<sup>gEX51</sup> was designed for inducing *DMD* repair via reading frame resetting or exon 51 skipping; HC-AdV.eCas9<sup>gIN43.gIN54</sup> was constructed for triggering *DMD* repair via removal of the major mutational hotspot region. All vector genomes were packaged in adenovirus type-5 capsids displaying CD46-interacting fibers motifs for efficient gene transfer into CAR-negative myogenic cells. ITR and  $\Psi$ , cis-acting adenovirus type-5 inverted terminal repeats and packaging signal. The vector genome lengths and titers in genome copies per ml are indicated. (B) Assessing the genetic integrity of control and *DMD* editing HC-AdVs. Restriction fragment length analyses was performed by agarose gel electrophoreses of ScaI-treated vector DNA isolated from purified vector particles. Marker, GeneRuler DNA Ladder molecular weight mix (Fermentas). Each of the parental plasmids were also digested with ScaI to serve as additional molecular weight references. *In silico* (SnapGene 4.3.10) and in-gel restriction fragment patterns (left and right panels, respectively).

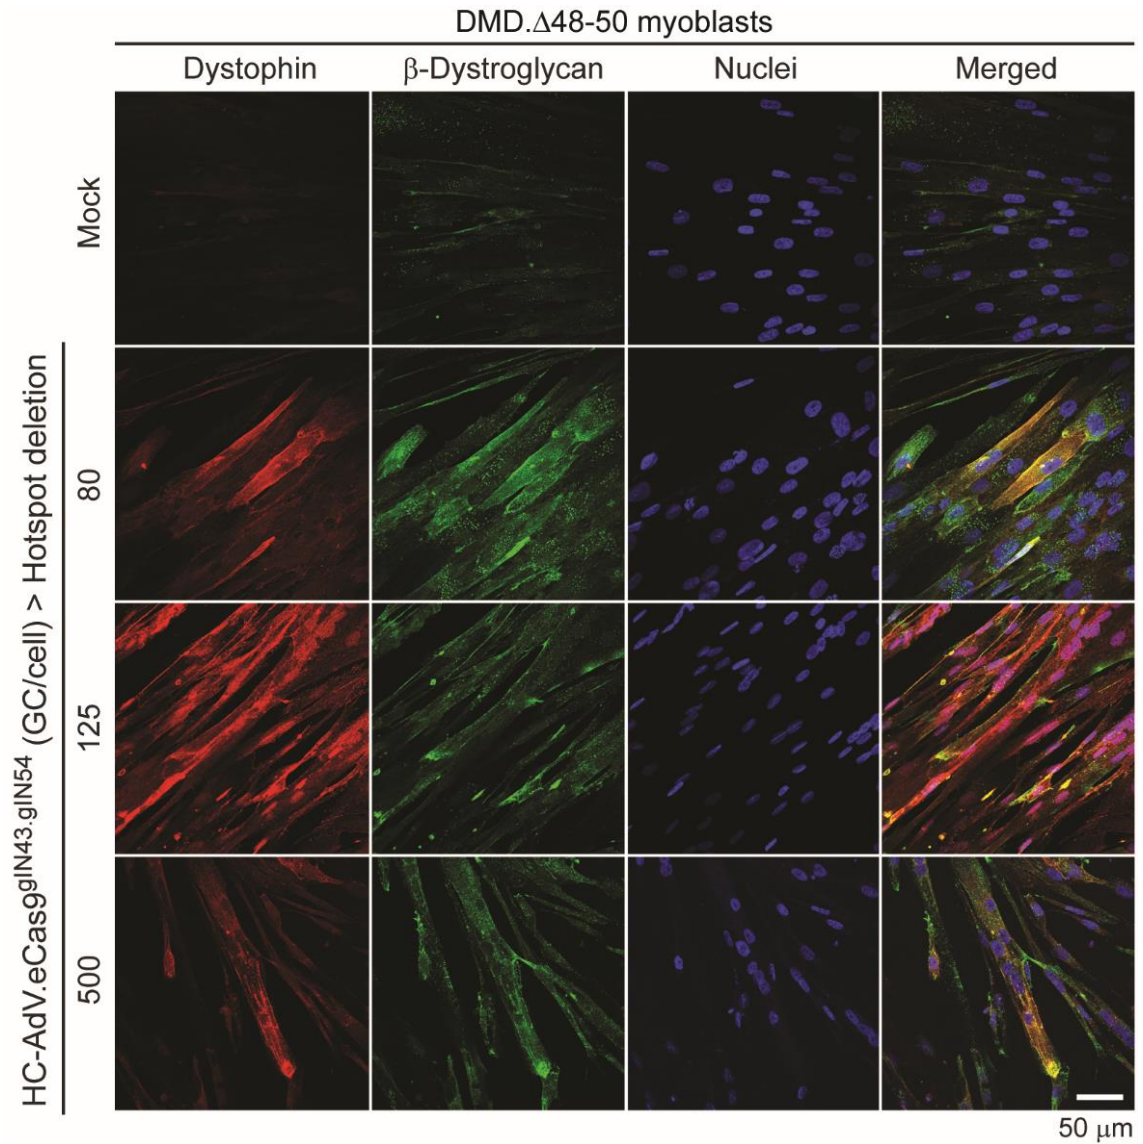

**Supplementary Figure S4. Assessing dystrophin rescue in DMD muscle cells after “all-in-one” HC-AdV transduction of dual RGNs.** Immunofluorescence microscopy on muscle cells edited by HC-AdV particles encoding dual RGNs targeting *DMD* introns 43 and 54. Confocal microscopy for dystrophin and β-dystroglycan was performed on myotubes differentiated from DMD.Δ48-50 myoblasts transduced with HC-AdV.eCas9<sup>gIN43.gIN54</sup> at the indicated MOIs. GC/cell; genome copies per cell.

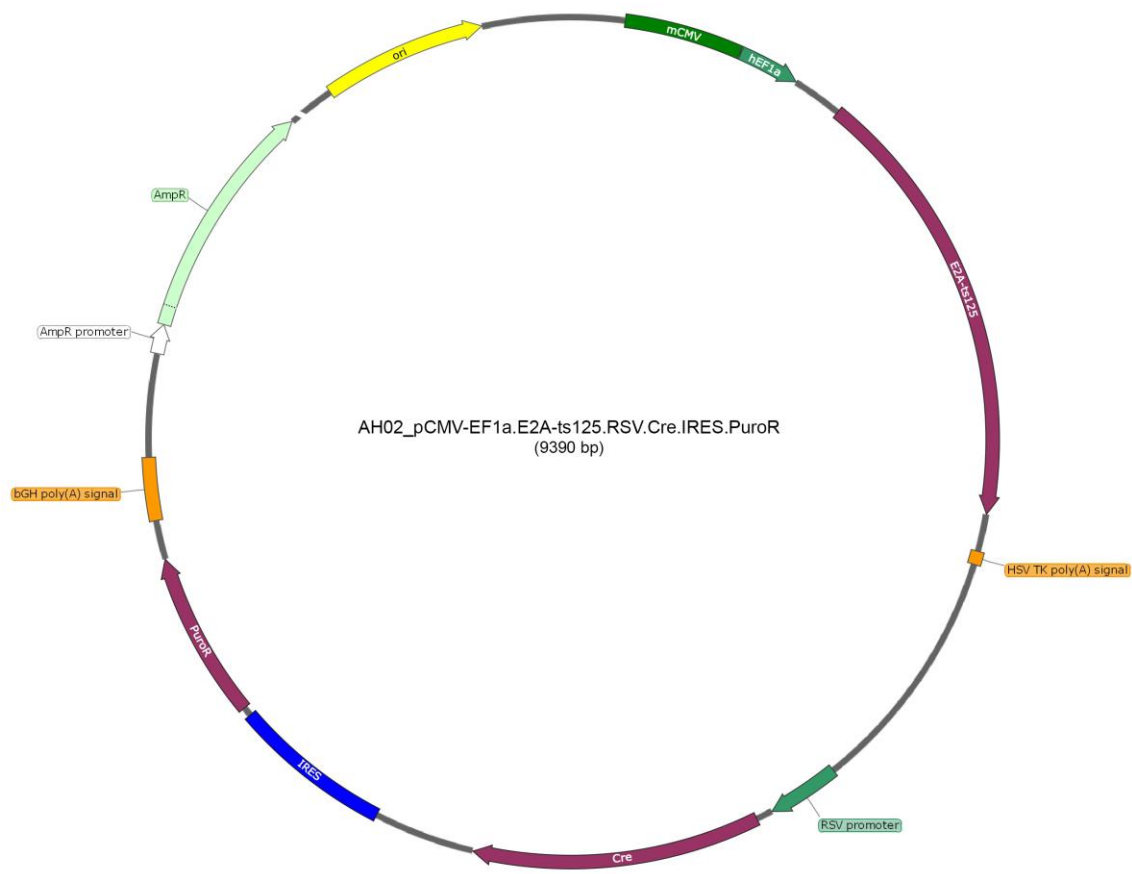

**Expression plasmid co-expressing E2A-ts125, Cre and Puromycin used to generate PEC3.30 packaging cells.** Regulatory sequences from the murine cytomegalovirus *immediate-early* and the human *EEF1A1* genes; E2A-ts125, adenovirus type-5 *E2A* open reading frame encoding a thermosensitive DNA-binding protein; RSV, Rous sarcoma virus enhancer/promoter; Cre, bacteriophage P1 *Cre* open reading frame encoding the site-specific Cre recombinase; IRES, internal ribosome entry site of the encephalomyocarditis virus (EMCV); PuroR, *puromycin N-acetyltransferase* selectable marker whose expression confers resistance to puromycin; bovine *GH1* polyadenylation signal; AmpR,  $\beta$ -lactamase selectable marker conferring resistance to ampicillin; ori, prokaryotic origin of replication.

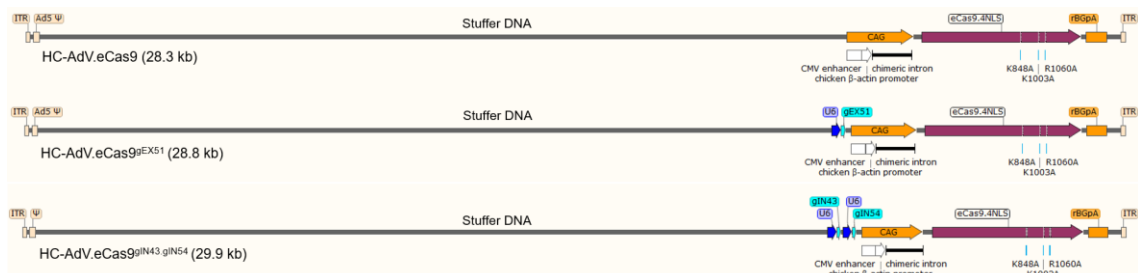

**Maps of HC-AdV genomes encoding eCas9.4NLS alone or together with optimized DMD-targeting gRNAs.** The non-coding adenovirus type-5 *cis*-acting elements: inverted terminal repeats (ITR) and packaging signal (Ad5  $\Psi$ ), necessary for vector DNA replication and encapsidation, respectively, are indicated. CAG, CMV *immediate-early* enhancer/chicken  $\beta$ -actin promoter; eCas9.4NLS, optimized variant of eSpCas9(1.1) endonuclease derived from the type II CRISPR/Cas system from *Streptococcus pyogenes* with the point mutations conferring enhanced specificity annotated; rBGpA, rabbit  $\beta$ -globin polyadenylation signal; Stuffer DNA added to increase HC-AdV genomes to sizes over the minimum length required for efficient DNA packaging into AdV capsids (i.e. ~27 kb); U6, RNA polymerase III promoter from the human *U6* gene; gEX51, gIN43 and gIN54, guide RNAs with optimized scaffolds targeting exon 51, intron 43 and



intron 54 of *DMD*, respectively. The top to bottom HC-AdV genomes are cloned in plasmids AW71\_pHC-AdV.eCas9, AW72\_pHC-AdV.eCas9<sup>gEX51</sup> and AW70\_pHC-AdV.eCas9<sup>gIN43.gIN54</sup>, respectively.

**>AW71\_pHC-AdV.eCas9 expression unit (6697 bp)**

```
TCGACATTGATTATTGACTAGTTATTAAATAGTAATCAATTACGGGGTCAATTAGTTCATAGCCCATATATGGAGTTCGGCG
TTACATAACTTACGGTAAATGGCCCGCTGGCTGACCGCCCAACGACCCCGCCATTGACGTCAATAATGACGTATGTT
CCCATAGTAACGCCAATAGGGACTTTCATTGACGTCAATGGGTGGAGTATTTACGGTAAACTGCCCACTTGGCAGTACA
TCAAGTGTATCATATGCCAAGTACGCCCCCTATTGACGTCAATGACGGTAAATGGCCCGCTGGCATTATGCCAGTACA
TGACCTTATGGGACTTTCCTACTTGGCAGTACATCTACGTATTAGTCATCGCTATTACCATGGTCGAGGTGAGCCCCACG
TTCTGCTTCACTCTCCCCATCTCCCCCCCCCTCCCCACCCCAATTTTGTATTTATTTTAAATTTATTTTGTGCAGC
GATGGGGGGCGGGGGGGGGGGGGGGCGCGCCAGGCGGGGGGGGGGGGGCGAGGGGGGGGGGGGGGGGGGGGGGAGAGGT
ACGGCGGCAGCCAATCAGAGCGGCGCGCTCCGAAAGTTTCCTTTTATGGCGAGGCGGCGGGCGGGCGGGCTATAAAAA
GCCAAGCGCGGGGGGGGGAGTCCGTGCGTTGCCCTTCGCCCCGTGCCCGCTCCGCGCCGCTCGCGCCCGCCGCC
GGCTCTGACTGACCGCTTACTCCACAGGTGAGCGGGGGGACGGCCCTTCTCTCCGGGTGTAATTAGCGCTTGGTT
TAATGACGGCTCGTTTCTTTCTGTGGCTGCGTGAAAGCCTTAAAGGGCTCCGGGAGGGCCCTTTGTGCGGGGGGGAGCG
GCTCCGGGGGGTGCCTGCGTGTGTGTGCGTGGGGAGCGCCGCTGCGGCCCGCGCTGCCGGCGGGCTGTGAGCGCTGCG
GGCGCGGGCGGGGGCTTTGTGCGCTCCGCGTGTGCGCGAGGGGAGCGCGCCGGGGGGCGGTGCCCGCGGTGCGGGGGGG
GTGCGAGGGGGAACAAGGCTGCGTGCGGGTGTGTGCGTGGGGGGGTGAGCAGGGGGTGTGGGCGCGGGCTCGGGCTGT
AACCGCCCCCTGCACCCCTCCCCGAGTTGCTGAGCACCGCCCGGCTTCGGGTGCGGGGGCTCCGTACGCGGGCTGGCGC
GGGGCTCGCGTGCAGGGGGGGGGTGGCGCAGGTGGGGGTGCCGGCGGGGGCGGGGCCGCTCGGGCGGGGAGGGCT
CGGGGAGGGGGCGGGCGGCCCGGAGCGCGGGCGGTGTGAGGCGCGGGGAGCCGAGCCATTGCCCTTTATGGTAAT
CGTGGGAGAGGGCGCAGGGACTTCCCTTTGTCCCAAATCTGTGCGGAGCCGAAATCTGGGAGGCGCCCGCACCCCTCT
AGCGGGCGCGGGGGCAAGCGGTGCGGCGCCGGCAGGAAGGAAATGGGCGGGGAGGGCCCTTCGTGCGTCCCGCGCCCGC
TCCCTTCTCCCTTCCAGCCTCGGGCTGTCCCGGGGGGACGGCTGCCTTCGGGGGGAGCGGGCGGGGGGGTTCG
GCTTCTGGCGTGTACCGCGGCTTAGAGCCTCTGTAACCATGTTTCATGCGCTTCTTCTTTTCCACAGACTGGAAGA
AACGTGCTGGTTATGTGCTGTCTCATTTTTGGCAAAGAATTATCGCATGCCTGCAGAGCTCTAGAGTC TAATGTTTA
ATTACCTGGAGCACCTGCCTGAAATCACTTTTTTTTTCAGGTTGGACCGGTGCCACCATGGACTATAAGGACCACGACGGAG
ACTACAAGGATCATGATATTGATTACAAGACGATGACGATAAGATGGCCCAAAGAAGAAGCGGAAGGTGGTATCCAC
GGAGTCCCAGCAGCCGACAAGAAGTACAGCATCGGCCCTGGACATCGGCACCAACTCTGTGGGCTGGGCCGTGATCACCGA
CGAGTACAAGGTGCCAGCAAGAAATCAAGGTGCTGGGCAACCCGACCGGCACAGCATCAAGAAGAACCTGATCGGAG
CCCTGCTGTTTCGACAGCGGCGAAACAGCCGAGGCCACCCGGCTGAAGAGAACCAGGAGAGATACACCAGACGGAAG
AACCGATCTGCTATCTGCAAGAGATCTTCAGCAACGAGATGGCCAAAGTGGACGACAGCTTCTTCCACAGACTGGAAGA
GTCCTTCTGTTGGAAGAGGATAAGAAGCACGAGCGGCACCCCATCTTCGGCAACATCGTGGACGAGGTGGCCTACCACG
AGAAGTACCCACCATCTACCACCTGAGAAAGAAATGGTGGACAGCACCGACAAGGCCGACCTGCGGTGATCTATCTG
GCCCTGGCCACATGATCAAGTTCGGGGCCACTTCTGATCGAGGGCGACCTGAACCCGACAACAGCGACGTGGACAA
GCTGTTTCATCCAGCTGGTGCAGACCTACAACCAGCTTTCGAGGAAAACCCCATCAACGCCAGCGGCTGGACGCCAAGG
CCATCTGTCTGCCAGACTGAGCAAGAGCAGACGGCTGAAAAATCTGATCGCCAGCTGCCCGGCAGAGAAGAAGATGGC
CTGTTTCGAAACCTGATTGCCCTGAGCCTGGGCTGACCCCAACTCAAGAGCAACTTCGACCTGGCCGAGGATGCCAA
ACTGCAGCTGAGCAAGGACACCTACGACGACGACCTGGACAACTGCTGGCCAGATCGGCGACAGTCCGCCGACCTGT
TTCTGGCCGCAAGAACCTGTCCGACGCCATCTGCTGAGCGACATCTGAGAGTGAACACCGAGATACCAAGGCCCC
CTGAGCGCTCTATGATCAAGAGATACGACGAGCACCACAGGACCTGACCCTGCTGAAAGCTCTCGTGCAGCAGCAGCT
GCCTGAGAAGTACAAGAGATTTTTCTCGACAGAGCAAGAACGGCTACGCCGGCTACATTGACGGCGGAGCCAGCCAGG
AAGAGTCTACAAGTTCATCAAGCCATCCTGGAAGATGGACGGCACCGAGGAACCTGCTCGTGAAGCTGAACAGAGAG
GACCTGCTGCGGAAGCAGCGGACCTTCGACAACGGCAGCATCCCCACCAGATCCACCTGGGAGAGCTGCACGCCATCT
CGCGCGGCAAGAAATTTTTTACCCTTCCGTAAGGCAACCGGGAAAAGATCGAGAAGATCCTGACCTCCGCTCCGCT
ACTACGTGGGCCCTCTGGCCAGGGGAAAACAGCAGATTCGCTGGATGACCAGAAAGAGCGAGGAAACCATCACCCCTGG
AACTTCGAGGAAGTGGTGGACAAGGGCGCTTCCGCCAGAGCTTCATCGAGCGGATGACCAACTTCGATAAGAACCTGCC
CAACGAGAAGGTGCTGCCAAGCACAGCCTGCTGTACGAGTACTTCACCGTGTATAACGAGCTGACCAAGTGAATACG
TGACCAGGGAAATGAGAAAGCCCGCTTCCGAGCGCGAGCAGAAAAGGCCATCGTGGACCTGCTGTCAAGACCAAC
CGGAAAGTGACCGTGAAGCAGCTGAAAGAGGACTACTTCAAGAAAATCGAGTGTCTCGACTCCGTGGAATCTCCGGCGT
GGAAGATCGGTTCAACGCCTCCCTGGGCACATACCAGATCTGCTGAAAATATCAAGGACAAGGACTTCTGGACAATG
AGGAAAACGAGGACATTTGGAAGATATCGTGTGACCCCTGACACTGTTTGAGGACAGAGAGATGATCGAGGAACGGCTG
AAAACCTATGCCACCTGTTTCGACGACAAAAGTATGAAGCAGCTGAAGCGGCGGAGATACACCGCTGGGGCAGGCTGAG
CCGGAAGCTGATCAACGGCATCCGGGACAAGCAGTCCGGCAAGACAATCCTGGATTTCTGAAGTCCGACGGCTTCGCCA
ACAGAACTTCATGCAGCTGATCCACGACGACGCTGACCTTTAAAGAGGACATCCAGAAAGCCAGGTGTCCGGCCAG
GGCGATAGCCTGCACGAGCACATTTGCCAATCTGGCCGGCAGCCCCGCCATTAAGAAGGGCATCCTGCAGACAGTGAAGGT
GGTGGACGAGCTCGTGAAGTGTGATGGCCGGCACAAGCCGAGAACAATCGTGTGATCGAAATGGCCAGAGAGAACCAGACCA
CCCAGAAGGGACGAGAAAGCAGCCGAGAGAATGAAGCGGATCAAGAGGGCATCAAAGAGTGGCCAGAGCAGCAGATCTG
AAAGAACACCCCGTGGAAAACACCCAGCTGCAGAAAGGAGAGCTGTACTGTACTACCTGCAGAATGGGCGGGATATGTA
CGTGGACAGGAACGGACATCAACCGGCTGTCCGACTACGATGTGGACCATACTGCTGCTCAGAGCTTTCTGGCCGACG
ACTCCATCGACAACAAGGTGCTGACCAGAAGCGACAAGAACCAGGGGCAAGAGCGACAACGTGCCCTCCGAAAGAGGTGCTG
AAGAAGATGAAGAATCTACTGGCGGAGCTGCTGAACGCCAAGCTGATACCCAGAGAAAGTTCGACAATCTGACCAAGGC
CGAGAGAGCGGGCTGAGCGAATGGATAAGGCCGGCTTCATCAAGAGACAGCTGGTGGAAACCCGGCAGATCACAAAGC
ACGTGGACAGATCTGGACTCCCGGATGAACACTAAGTACGACGAGAAATGACAAGCTGATCCGGGAAGTGAAGTGTATC
ACCTGAAGTCCAAGCTGGTGTCCGATTTCCGGAAGGATTTCCAGTTTACAAAAGTGCAGGATCAACAACCTACCACCA
CGCCACGACGCTTACCTGAACGCCGCTGTTGGAAACCGCCCTGATCAAAAAGTACCCTGCGCTGGAAAGCGAGTTCGTGT
```

ACGGCGACTACAAGGTGTACGACGTGCGGAAGATGATCGCCAAGAGCGAGCAGGAAATCGGCAAGGCTACCGCCAAGTAC  
TTCTTCTACAGCAACATCATGAACTTTTTCAAGACCAGATTACCCCTGGCCAACGGCGAGATCCGGAAGGGCCTCTGAT  
CGAGACAAACGGCGAAACCGGGGAGATCGTGTGGGATAAGGGCCGGGATTTTGCCACCGTGGGAAAGTGTGAGCATGC  
CCCAAGTGAATATCGTGA AAAAGACCAGGTTGCAGACAGGCGGCTTACGCAAAAGATCTATCCTGCCCAAGAGGAACAGC  
GATAAGCTGATCGCCAGAAAAGGACTGGGACCCTAAGAAGTACGGCGGCTTCGACAGCCCCACCGTGGCCTATTCTGT  
GCTGGTGGTGGCCAAAGTGGAAAAGGGCAAGTCCAAGAACTGAAGAGTGTGAAAGAGCTGTGGGGATCACCATCATGG  
AAAGAACGAGCTTCGAGAAGAATCCATCGACTTCTGGAAGCCAAGGGCTACAAAGAGTGA AAAAGGACCTGATCATC  
AAGCTGCCTAAGTACTCCCTGTTTCGAGCTGGA AAAACGGCCGGAAGAGAATGCTGGCCTCTGCCGGCGAACTGCAGAAGGG  
AAACGAACTGGCCCTGCCCTCCAAATATGTGAACCTCTGTACCTGGCCAGCCACTATGAGAAGCTGAAGGGCTCCCCCG  
AGGATAATGAGCAGAAACAGCTGTTTGTGGAACAGCACAAGCACTACCTGGACGAGATCATCGAGCAGATCAGCGAGTTC  
TCCAAGAGAGTGTATCCTGGCCGACGCTAATCTGGACAAAGTGTGTCCGCTACAACAGCACCGGGATAAGCCCATCAG  
AGAGCAGGCCGAGAATATCATCCACCTGTTTACCCTGACCAATCTGGGAGCCCCCTGCCGCTTCAAGTACTTTGACACCA  
CCATCGACCGGAAGAGGTACACCAGCACC AAAGAGGTGCTGGACGCCACCCCTGATCCACCAGAGCATCACC GGCCGTGAC  
GAGAACGAGTACGACTGTCTCAGCTGGGAGGCGACAAAAGCCGGCCGACGAAAAGGCGCCGACGAAAAGGCGCCGAAAAGAA  
AAAGGCTAGCGGCTCCCCAAGAAAACGCAAGGTGGAAGATCCTAAGAAAAGCGGAAAAGTGAAGAATTCCTGCAG  
GACGCGTGGAAATTCCTCCTCAGGTGCAGGCTGCCATCAGAAGGTGGTGGCTGGTGTGGCCAATGCCCTGGCTCACAA  
ATACCACTGAGATCTTTTCCCTCTGCCAAAATATAGGGGACATCATGAAGCCCTTGGACATCTGACTTCTGGCTAAT  
AAAGGAAATTTATTTTCATTGCAATAGTGTGTTGGAATTTTTTGTGTCTCTCACTCGGAAGGACATATGGGAGGGCAAT  
CATTAAAACATCAGAATGAGTATTTGGTTTAGAGTTTGGCAACATATGCCATATGCTGGCTGCCATGAACAAAGGTGGC  
ATAAAGAGGTCATCAGTATATGAAAACAGCCCCCTGCTTCCATCTTATTCCATAGAAAAGCCTTGACTTGAGGTTAG  
ATTTTTTTTATATTTGTTTTGTTTTTTTTTTTAACTCCCTAAAATTTTCTTACATGTTTTACTAGCCAGATT  
TTCTCTCTCTCTGACTACTCCCAGTCATAGCTGTCCCTCTCTCTTATGAAGATC

**>AW72\_pHC-Adv.eCas9<sup>gEX51</sup> expression units (7195 bp)**

GAGGGCTATTTCCCATGATTTCCTTCATATTTGCATATACGATACAAGGCTGTTAGAGAGATAATTGGAATTAATTTGAC  
TGTAACACAAAGATATTAGTACAAAATACGTGACGTAGAAAGTAATAATTTCTTGGGTAGTTTGCAGTTTTAAAATTTAT  
GTTTTAAAATGGACTATCATATGCTTACCCTAAGTATTTGAAAGTATTTTCGATTTCTTGGCTTTATATATCTTGTGGAAAGGA  
CGAAACACCGACAGAGTAAACAGTCTGAGTGTTCAGAGCTATGCTGGAAACAGCATAGCAAGTTGAAATAAGGCTAGTC  
CGTTATCAACTTGA AAAAGTGGCACCGAGTCGGTCTTTTTTTGAAATTCGGTACCGGCGCGCCCGTACGACTAGTATTAC  
CCTGTTATCCCTAGCGGCCGACTTAAAGTTACGCGTACGTGCGGACCGCGGACATGTACAGAGCTCGAGAAGAAAACATTT  
AAATCTCGAGCCATGGATTGACATTGATTATTGACTAGTTATTAATAGTAATCAATTACGGGGTCATTAGTTCATAGCC  
CATAATGAGGTTCCGCGTTACATAACTTACGGTAAATGGCCCGCTGGCTGACCGCCAACGACCCCCGCCATTGACG  
TCAATAATGACGTATGTTCCCATAGTAAACGCAATAGGGACTTTCCATTGACGTCAATGGGTGGAGTATTTACGGTAAAC  
TGCCCACTTGGCAGTACATCAAGTGTATCATATGCCAAGTACGCCCCCTATTGACGTCAATGACGGTAAATGGCCCGCT  
GGCATATGCCCAGTACATGACCTTATGGGACTTTCTACTTGGCAGTACATCTACGTATTAGTCTATGCTATTACCATG  
GTCGAGGTGAGCCACGTTCTGCTTCACTTCCCCATCTCCCCCTCCCCACCCCAATTTTGTATTTATTTATTTT  
TTAATTTATTTTGTGCAGCATGGGGGCGGGGGGGGGGGCGCGCGCCAGGCGGGCGGGGCGGGGCGAGGGGCGGGG  
GGGGCGAGGCGGAGAGGTGCGGCGGACGCAATCAGAGCGGCGCGCTCCGAAAGTTTCTTTTATGGCGAGGCGGCGGG  
GCGGCGGCCCTATAAAAAGCGAAGCGCGCGCGGGCGGGAGTCTGCTGCGTTGCCTTCGCCCGTGCCTCGCGCGCG  
CCTCGCGCGCCCGCCCGGCTCTGACTGACCGGTTACTCCCACAGGTGAGCGGGCGGGACGGCCCTTCTCTC CGGG  
TGTAATTAGCGCTTGGTTAATGACGGCTCGTTTCTTTCTGTGGTGCCTGAAAGCCTTAAAGGGCTCCGGGAGGGCCC  
TTTTGTCGGGGGGGACCGGCTCGGGGGTGCCTGCGTGTGTGTGCTGGGGAGCGCGCGCTGCGGCCCGCGCTGCCCG  
GCGGCTGTGAGCGCTGCGGGCGCGGCGGGGCTTTGTGCGCTCCGCGTGTGCGCGAGGGGAGCGCGGCCGGGGCGGTG  
CCCCGCGGTGCGGGGGGCTGCGAGGGGAACAAAGGCTGCGTGC GGGTGTGTGCGTGGGGGGT GAGCAGGGGTGTGG  
GCGCGCGGTGCGGCTGTAACCCCCCTGCACCCCTCCCGAGTTGCTGAGCACGGCCGGCTTCGGGTGCGGGGCT  
CCGTACGGGGCGTGGCGGGGCTCGCGTGC GGCGGGGGTGGCGCAGGTGGGGTGC GGCGGGCGGGCGGGGCCG  
CTCGGGCCGGGAGGGCTCGGGGAGGGGCGGGCGGGCCCGGAGCGCGGGCGGCTGTGCGAGGCGGGCGGAGCCGAGCC  
ATTGCCCTTTATGTAACTGTGCGAGAGGGCGCAGGACTTCTTTGTCCAAATCTGTGCGGAGCCGAAATCTGGGAGG  
CGCCCGCTCACTAGCGGGCGGGGCGAAGCGGTGCGGCGCGGCGAGGAAGGAAATGGGCGGGGAGGGCCTTCG  
TGCGTCCGCGCGCCGCTCCCTTCTCCCTCTCCAGCTCGGGGCTGTCCGCGGGGGACGGCTGCCTTCGGGGGGAC  
GGGGCAGGGCGGGTTCGGCTTCTGGCGTGTGACCGCGGCTCTAGAGCTCTGCTAACCATGTTTCATGCCTTCTCTTT  
TTCTTACAGCTCCTGGCAACGTGCTGGTTATTGTGCTGTCTCATCATTTTGGCAAAGAATATCGCATGCCTGCAGAGC  
TCTAGAGTCTAATGTTAATTACCTGGAGCACCTGCCTGAAATCACTTTTTTTTTCAGGTTGGACCGGTGCCACCATGGACT  
ATAAGGACCACGAGAGACTACAAGGATCATGATAATTGATTACAAAGACGATGACGATAAGATGGCCCCAAAGAAGAAG  
CGAAAGTTCGGTATCCACGGAGTCCCAGCAGCCGACAAGAAGTACAGCATCGGCCTGGACATCGGCACCAACTCTGTGGG  
CTGGCCGCTGATCACCAGCAGTACAAAGTGCACAGCAAAGAAATCAAGGTGCTGGGCAACACCGACCGCACAGCATCA  
AGAAGAACCTGATCGGAGCCCTGCTGTTCGACAGCGCGAAAACAGCCGAGGCCACCCGGCTGAAGAGAACC GCCAGAAGA  
AGATAACACGAGCGGAAGAACC GGATCTGCTATCTGCAAGAGATCTTCAGCAACGAGATGGCCAAGGTGGACGACAGCTT  
CTTCCACAGACTGGAAGAGTCTTCTTGGTGAAGAGGATAAGAAGCAGGAGCGGCACCCCATCTTCGCAACATCGTGG  
ACGAGGTGGCCTACCACGAGAAGTACCCACCATCTACCACCTGAGAAAAGAACTGGTGGACAGCACCGACAAGGCCGAC  
CTGCGGCTGATCTATCTGGCCCTGGCCACATGATCAAGTTCGGGGCCACTTCTGATCGAGGGCGACCTGAACCCCGA  
CAACAGGTCAGTGGACAAGTGTTCATCCAGTGGTGCAGACCTACAACCACTGTTCGAGGAAAACCCCAACGCCA  
GCGGCGTGGACGCCAAGGCCATCTGTCTGCCAGACTGAGCAAGAGCAGACGGCTGGAAAATCTGATCGCCAGCTGCC  
GGCGAGAAGAAGATGGCCTGTTCGAAAACCTGATTGCCCTGAGCCTGGGCTGACCCCAACTTCAAGAGCAACTTCGA  
CCTGGCCGAGGATGCCAAACTGCAGCTGAGCAAGGACACTACGACGACGACCTGGACAACCTGCTGGCCAGATCGGG  
ACCAGTACGCCGACCTGTTTCTGGCCGCAAGAACCTGTCCGACGCCATCTGCTGAGCGACATCTGAGAGTGAACACC  
GAGATCACC AAGCCCCCTGAGCGCTCTATGATCAAGAGATACGACGAGCACCACCAGGACCTGACCCTGCTGAAAGC  
TCTCGTGC GGCGAGCTGCCTGAGAAGTACAAGAAGATTTTCTTCGACCAGAGCAAGAACGGCTACGCCGGCTACATTC

ACGGCGGAGCCAGCCAGGAAGAGTTCTACAAGTTTCATCAAGCCCATCCTGGAAAAGATGGACGGCACCCAGGAAGTCTGCT  
GTGAAGCTGAACAGAGAGGACCTGCTGCGGAAGCAGCGGACCTTCGACAACGGCAGCATCCCCACCAGATCCACCTGGG  
AGAGCTGCACGCCATTTCTGCGGCGGCAGGAAGATTTTACCCATTCTGAAGGACAACCCGGGAAAAGATCGAGAAGATCC  
TGACCTTCCGCATCCCTACTACGTGGGCCCTCTGGCCAGGGGAAAACAGCAGATTCGCCTGGATGACCAGAAAAGAGCGAG  
GAAACCATCACCCCTGGAACCTCGAGGAAAGTGGTGGACAAGGGCGCTTCCGCCAGAGCTTCATCGAGCGGATGACCAA  
CTTCGATAAGAACC TGCCCAACGAGAAGGTGCTGCCAAGCAGCAGCTGCTGTACGAGTACTTCACCGTGTATAACGAGC  
TGACCAAAGTGAAATACGTGACCGAGGGAATGAGAAAAGCCCGCTTCTGAGCGGCGAGCAGAAAAAGGCCATCGTGGAC  
CTGCTGTTCAAGACCAACCGGAAAGTGACCGTGAAGCAGCTGAAAGAGGACTACTTCAAGAAAATCGAGTGCTTCGACTC  
CGTGGAATCTCCGGCGTGGAAGATCGGTTCAACGCCTCCCTGGGCACATACCACGATCTGCTGAAAATATCAAGGACA  
AGGACTTCTGGACAAATGAGGAAAACGAGGACATTTCTGGAAGATATCGTGTGACCTGACACTGTTTGAGGACAGAGAG  
ATGATCGAGGAACGGCTGAAAACCTATGCCACCTGTTTCGACGACAAAGTGATGAAGCAGCTGAAGCGGCGGAGATACAC  
CGGCTGGGGCAGGCTGAGCCGGAAGCTGATCAACGGCATCCGGGACAAGCAGTCCGGCAAGACAATCTGGATTTCTTGA  
AGTCCGACGGCTTCGCCAACAGAACTTTCATGACGATGATCCACGACGACAGCCTGACCTTTAAAGAGGACATCCAGAAA  
GCCCAAGTGTCCGGCCAGGGCAGATAGCTGCACAGCAGCATTTGCCAATCTGGCCGGCAGCCCGCCATTAAAGAGGGCAT  
CCTGCAGACAGTGAAGGTGGTGGACGAGCTCGTGAAGTGATGGGCCGGCACAAGCCCGAGAATCTCGTATCGAAATGG  
CCAGAGAGAACCAGACCACCCAGAAGGGACAGAAGAACAGCCGCGAGAGAATGAAGCGGATCGAAGAGGGCATCAAAGAG  
CTGGGACAGCAGATCTGAAAGAACACCCCGTGGAAAACACCCAGCTGCAGAACGAGAAGCTGTACCTGTACTACCTGCA  
GAATGGGCGGGATATGTACGTGGACCAGGAACCTGGACATCAACCCGGCTGTCCGACTACGATGTGGACCATATCGTGCCTC  
AGAGCTTTCTGGCCGACGACTCCATCGACAACAAGTGTCTGACCAGAAGCGACAAGAACCAGGGGCAAGAGCGACAACGTG  
CCCTCCGAAGAGGTCTGGAAGAAGATGAAGAACTACTGGCGGACAGCTGCTGAACGCCAAGCTGATACCAGAGAAAGTT  
CGACAACTGACCAAGGCCGAGAGAGCGGCTGAGCGAAGCTGGATGAAGCCGGCTTCATCAAGAGACAGACTGGTGGAAA  
CCCGGCAGATCACAAAGCAGTGGCACAGATCTGGACTCCCGGATGAACACTAAGTACGACGAGAATGACAAGCTGATC  
CGGGAAGTGAAAGTGATCACCTGAAAGTCCAAGCTGGTGTCCGATTTCCGGAAGGATTTCCAGTTTTTACAAAGTGCGCGA  
GATCAACAACACTACCACACGCCCACGACGCTACCTGAACGCCGTCTGGGAACCGCCCTGATCAAAAAGTACCCTGCGC  
TGGAAAGCGAGTTCGTGTACGGCGACTACAAGGTGTACGACGTGCGGAAGATGATCGCCAAGAGCGAGCAGGAAATCGGC  
AAGGCTACCGCAAGTACTTCTTACAGCAACATCATGAACTTTTTCAAGACCGAGATTAACCTGGCCAACGGCGAGAT  
CCGGAAGGCGCCTCTGATCGAGACAAACGGCGAAAACCGGGGAGATCGTGTGGGATAAAGGCCGGATTTTGCACCCGTG  
GGAAAGTGCTGAGCATGCCCAAGTGAATATCGTGA AAAAGACCGAGGTGCAGACAGGCGGCTTCAGCAAAGAGTCTATC  
CTGCCAAGAGGAACAGCGATAAGCTGATCGCCAGAAAAGAGGACTGGGACCTAAGAAGTACGGCGGCTTCGACAGCCC  
CACCTGGCCTATTCTGTGCTGGTGGTGGCCAAAGTGGAAAAGGGCAAGTCCAAGAACTGAAGAGTGTGAAAGAGCTGC  
TGGGGATCACCATCTGGAAGAAGCAGCTTCGAGAAGAATCCCATCGACTTTCTGGAAGCAAGGGGTACAAAAGAAGTG  
AAAAAGGACCTGATCATCAAGCTGCCAAGTACTCCCTGTTTCGAGCTGGAAAACGGCCGGAAGAGAATGCTGGCCTCTGC  
CGCGAAGTGCAGAAAGGAAACGAACTGGCCCTGCCCTCCAATATGTGAACCTTCTGACCTGGCCAGCCACTATGAGA  
AGCTGAAGGGCTCCCGGAGGATAATGAGCAGAAAACAGCTGTTTGTGGAACAGCACAAGCACTACCTGGACGAGATCATC  
GAGCAGATCAGCGAGTCTCCAAGAGAGTGTCTGGCCGACGCTAATCTGGACAAAGTGTGTCCGCCACAACAAGCA  
CCGGGATAAGCCCATCAGAGAGCAGGCCGAGAATATCATCCACCTGTTTACCCTGACCAATCTGGGAGCCCTGCCGCC  
TCAAGTACTTTGACACCACCATCGACCGGAAGAGGTACACCAGCACCAAAAGAGGTGCTGGACGCCACCTGATCCACCAG  
AGCATCACCGCCCTGTACGAGACACGGATCGACCTGTCTCAGCTGGGAGGCGACAAAAGGCCGGCCGACGAAAAGGC  
CGGCCAGGCAAAAAGAAAAGGCTAGCGGCTCCCCAAGAAAACGCAAGGTGGAAGATCCTAAGAAAAGCGGGAAG  
TGTAAGAATCCCTGAGGACGCGTGAAATTCACCTCAGGTGCAGGCTGCCTATCAGAAGGTGGTGGCTGTGGC  
CAATGCCCTGGCTCACAATAACCACTGAGATCTTTTTCCCTCTGCCAAAAATTATGGGGACATCATGAAGCCCTTGAGC  
ATCTGACTTCTGGCTAATAAAGGAAATTTATTTTTCATTGCAATAGTGTGTTGGAATTTTTTGTGTCTCTCACTCGGAAGG  
ACATATGGGAGGGCAATCATTTAAAACATCAGAATGAGTATTTGGTTTAGAGTTTGGCAACATATGCCATATGCTGGCT  
GCCATGAACAAAGGTGGCTATAAAGAGGTATCAGTATATGAAACAGCCCCCTGCTGTCCATTCTTATCCATAGAAAA  
GCCTTGACTTGAGGTTAGATTTTTTTTATATTTTGTGTTATTTTTTTCTTTAACATCCCTAAAATTTTCTTACA  
TGTTTTACTAGCCAGATTTTTCTCTCTCTGACTACTCCAGTCATAGCTGTCCCTCTCTCTTATGAAGATC

**>AW70\_pHC-Adv.eCas9<sup>IN43</sup>.g<sup>IN54</sup> expression units (7608 bp)**

GAGGGCCTATTTCCCATGATTTCCTTCATATTTGCATATACGATACAAGGCTGTTAGAGAGATAATTGGAATTAATTTGAC  
TGTAACACAAAGATATAGTACAAAATACGTGACGTAGAAAGTAATAATTTCTTGGGTAGTTTGCAGTTTAAAATTA  
GTTTTAAAATGGACTATCATATGCTTACCGTAACCTGAAAGTATTTTCGATTTCTTGGCTTTATATATCTGTGGAAGGA  
CGAAACACCGTTACATACAGGCTAGGGAGGTTTCAGAGCTATGCTGGAAAACAGCATAGCAAGTTGAAATAAGGCTAGTCC  
GTTATCAACTGAAAAAGTGGCACCAGTCCGTTGTTTTTGAATTCGGTACCGGCGCGCCGGTACCTCTAGAGTCCGG  
CCGCCCTTACCAGGGGCTATTTCCCATGATTCCTTCATATTTGCATATACGATACAAGGCTGTTAGAGAGATAATT  
GGAATTAATTTGACTGTAAACACAAAGATATTAGTACAAAATACGTGACGTAGAAAGTAATAATTTCTTGGGTAGTTTGC  
AGTTTTAAAATTAATGTTTTAAAATGGACTATCATATGCTTACCGTAACCTGAAAGTATTTTCGATTTCTTGGCTTTATATA  
TCTTGTGGAAGGACGAAACACCGGTACACAATAGGTACGGAAGTTTCAGAGCTATGCTGGAACAGCATAGCAAGTTGA  
AATAAGGCTAGTCCGTATCAACTGAAAAAGTGGCACCAGTCCGTTGTTTTGAAATTCGGTACCGGCGCGCCCGTA  
CGACTAGTATTACCCTGTTATCCCTAGCGGCCGACTTAAGTTACGCGTACGTCCGACCGCGGACATGTACAGAGCTCG  
AGAAGAACATTTAAATCTCGAGCCATGGATTTCGACATGATTAATTTGACTAGTTATTAATAGTAATCAATACGGGGTCA  
TTAGTTCCATAGCCCATATATGGAGTTCCGCGTTACATAAATACGTTACGTTAAATGCCCCGCTGGCTGACCCGCAACGACC  
CCGCCATTGACGTCAATAATGACGTATGTTCCCATAGTAACGCAATAGGGACTTTCCATTGACGTCAATGGGTGGAGT  
ATTTACGGTAAACTGCCACTTGGCAGTACATCAAGTGTATCATATGCCAAGTACGCCCCCTATTGACGTCAATGACGGT  
AAATGGCCCGCTGGCATATGCCAGTACATGACCTTATGGGACTTTCCCTACTTGGCAGTACATCTACGTATTAGTCAT  
CGCTATTACCATGGTGCAGGTTAGCCCCACGTTCTGCTTCACTCTCCCCATCTCCCCCCCCCTCCCCACCCCAATTTTGT  
ATTTATTTATTTTTTAAATATTTTTGTGACGCGATGGGGGCGGGGGGGGGGGGGCGCGCCAGGCGGGGCGGGGCGGGG  
CGAGGGGCGGGGCGGGGCGAGGCGGAGGTTGCGGCGGCAGCCAATCAGAGCGGCGGCTCCGAAAGTTTCCTTTTATGG

CGAGCGCGCGCGCGCGCGCCCTATAAAAAGCGAAGCGCGCGCGGGCGGGAGTCGCTGCGTTGCCTTCGCCCGTGC  
CCGCTCCGCGCGCCCTCGCGCCGCCCGCCCGGCTCTGACTGACCGGTTACTCCACAGGTGAGCGGGCGGGACGGCC  
TTCTCTCCGGGCTGTAATTAGCGCTTGGTTAATGACGGCTCGTTTCTTTCTGTGGCTGCGTGAAAGCCTTAAAGGC  
TCCGGAGGGCCCTTTGTGCGGGGGGAGCGGCTCGGGGGTGCCTGCGTGTGTGTGTGCGTGGGGAGCGCCGCTGCGG  
CCCGCGCTGCCCGCGGCTGTGAGCGCTGCGGGCGCGGGCGGGGCTTTGTGCGCTCCGCGTGTGCGCGAGGGGAGCGCG  
GCCGGGGGGCGTCCCCCGGCTGCGGGGGGCTGCGAGGGGAACAAGGCTGCGTGCGGGGTGTGTGCGTGGGGGGTGA  
GCAGGGGTGTGGGCGCGGTCGGCTGTAACCCCCCTGCACCCCCCTCCCGATTGCTGGCAAGAATCCGGCTT  
CGGGTGCGGGGCTCCGTACGGGGCGTGGCGGGGGCTCGCCGTGCCGGGGCGGGGGTGGCGCGAGGTGGGGTGC  
GGGGCGGGCCCTCGGGCCGGGGAGGGCTCGGGGAGGGGCGCGGGCCCGGAGCGCGCGGCTGTGAGGGCGG  
GCGAGCCGAGCCATTGCCTTTTATGTAATCGTGCAGAGGGCGCAGGACTTCCTTTGTCCCAAATCTGTGCGGAGCC  
GAAATCTGGGAGGCGCCCGCACCCCTCTAGCGGGCGCGGGGCGAAGCGGTGCGGCGCCGGCAGGAAGAAATGGCG  
GGGAGGGCTTCGTGCGTCCCGCGCCCGCTCCCTTCTCCCTCTCCAGCCTCGGGGCTGTCCGCGGGGGACGGCTGC  
TTCCGGGGGGGACGGGCGAGGGCGGGTTCGGCTCTGGCGTGTGACCGGGGCTCTAGAGCCTCTGCTAACCATGTTCA  
TGCTTCTTTTTTCTACAGCTCCGGCAACTCGTGGTATTGTTGCTGTCTCATTTTTTGGCAAGAATATTCGC  
ATGCTGCGAGGCTTAGAGTCTAATGTTAATTACCTGGAGCCTGCCTGAAATCACTTTTTTTCAGGTGGACCGGT  
GCCACCATGACTATAAGGACCACGACGGAGACTACAAGGATCATGATATTGATTACAAAGACGATGACGATAAGATGGC  
CCCAAAGAAGAAGCGAAGGTCCGTATCCACGGAGTCCAGCAGCCGACAAGAAGTACAGCATCGGCCCTGGACATCGGCA  
CCAATCTGTGGGTGGGCCGTGATCACCGACGAGTACAAGGTGCCAGCAAGAAATCAAGGTGCTGGCAACACCGAC  
CGGCACAGCATCAAGAAGAACCTGATCGAGCCCTGCTGTTCGACAGCGCGAAACAGCCGAGGCCACCCGGCTGAAG  
AACCAGAGAAGAATACACACAGCAGCGAAGAACCGGATCTGCTATCTGCAAGAGATCTTCAGCAACGAGATGGCAAG  
TGGACGACAGCTTCTCCACAGACTGGAAGAGTCTTCTGGTGAAGAGGATAAGAAGCACGAGCGGCCACCCCATCTTC  
GGCAACATCGTGGACGAGGTGGCTTACCACGAGAAGTACCCACCATCTACCACCTGAGAAAGAACTGGTGGACAGCAC  
CGACAAGGCCGACTGCGGCTGATCTATCTGGCCCTGGCCACATGATCAAGTTCGGGGCCACTTCTGATCGAGGGCG  
ACCTGAACCCCGACACAGCGAGCTGGACAAGCTGTTCATCCAGCTGGTGCAGACCTACAACCAGCTGTTCGAGGAAAC  
CCCATCAACGCCAGCGGCTGGACGCCAAGGCCATCTGTCTGCCAGACTGAGCAAGAGCAGACGGCTGGAAAATCTGAT  
CGCCAGCTGCCCGGCGAGAAGAAGAATGGCCTGTTGGAACCTGATTCGCTGAGCCTGGGCTGACCCCAACTCA  
AGAGCAACTTCGACTGGCCGAGGATGCCAAACTGCAGCTGAGCAAGGACACCTACGACGACGACACTGGACAACCTGCTG  
GCCAGATCGGCGACAGTACGCCGACTGTTTCTGGCCGCAAGAACCTGTCGACGCCATCTGCTGAGCGACATCTT  
GAGAGTGAACACCGAGATACCAAGGCCCCCTGAGCGCTCTATGATCAAGAGATACGACGAGCACCACCAGGACTGA  
CCCTGCTGAAAGCTTCGTGCGGCAGCAGCTGCCCTGAGAAGTACAAGAGATTTTTCTCGACCAGAGCAAGAACGGCTAC  
GCCGGCTACATTGACGGCGGAGCCAGCCAGGAAGAGTTCTACAAGTTTATCAAGCCCATCTTGGAAAAGATGGACGGCAC  
CGAGGAACCTGCTGAAGCTGAACAGAGAGGACCTGCTGCGGAAGCAGCGGACCTTCGACAACGGCAGCATCCCCCACC  
AGATCCACTGGGAGACTGACCGCCATTCTGCGGGCAGGAAGATTTTTACCCATCTTGAAGCAACCGGGGAAAAG  
ATCGAGAAGATCTTCCGACTTCCGCATCCCTACTACTGCGCCCTCTGGCCAGGGAAACAGAGATTTCCCTGGATGAC  
CAGAAAGAGCGAGGAAACCATCACCCCTGGAACCTCGAGGAAGTGGTGGACAAGGGCGCTTCCGCCAGAGCTTCATCG  
AGCGGATGACCAACTTCGATAAGAACCTGCCAACGAGAAGGTGCTGCCAAGCACAGCTGCTGTACGAGTACTTCACC  
GTGTATAACGAGCTGACCAAAAGTAAATACGTGACCAGGGAAATGAGAAAGCCCGCTTCTGAGCGGCAGCAGAAAA  
GGCCATCGTGGACCTGCTGTTCAAGACCAACCGAAAGTGACCGTGAAGCAGCTGAAAGAGGACTACTTCAAGAAAATCG  
AGTGTCTCGACTCCGTGGAATCTCCGGCGTGAAGATCGTTCAACGCTCCCTGGGCACATACACGATCTGCTGAA  
ATTAACAAGAGACTGGGACTTCCGCAATGAGGAAAACGAGGACATTTGGAAGATATCGTGTACCCTGACCTGACTGTT  
TGAGGACAGAGAGATGATCGAGGAACGGCTGAAAACCTATGCCACCTGTTTCGACGACAAAGTATGAAGCAGCTGAAGC  
GGCGGAGATACACCGGCTGGGGCAGGCTGAGCCGGAAGCTGATCAACGGCATCCGGGACAAGCAGTCCGGCAAGACAATC  
CTGGATTTCTGAAGTCCGACGGCTTCGCCAACAGAACTTCATGCAGCTGATCCACGACGACAGCCTGACCTTTAAAGA  
GGACATCCAGAAAGCCAGGTGTCCGGCCAGGGCGATAGCCTGCACGAGCACATTGCCAATCTGGCCGCGAGCCCCGCCA  
TTAAGAAGGGCATCTTCAGACAGTGAAGGTGGTGGACGAGCTCGTGAAGTGAAGTGGCCCGGCACAAGCCCGAGAATC  
GTGATCGAAATGGCCAGAGAGAACCAGACCCAGAAAGGACAGAAAGAACAGCCCGGAGAGAATGAAGCGGATC GAAGA  
GGGCATCAAGAGCTGGGCGAGCTTCCGCAAGTCCGTAAGGAAACAGCCCGTGGAAAAACCCAGCTGCGAAGCAGAAAGCTGATCC  
TGTAACCTGCAGAAATGGGCGGGATATGTACGTGGACCAGGAACCTGGACATCAACCGGCTGTCCGACTACGATGTGGAC  
CATATCGTGCCTCAGAGCTTTCTGGCCGACGACTCCATCGACAACAAGGTGCTGACCAGAAGCGACAAGAACCAGGGGCAA  
GAGCGACAACGTGCCCTCCGAAGAGTTCGTGAAGAAGTGAAGAATCTGCGCGCAGCTGCTGAACGCCAAGCTGATTA  
CCCAGAGAAAGTTCGACAATCTGACCAAGGCCGAGAGAGGGCGCCTGAGCGAACTGGATAAGGCCGGCTTCATCAAGAGA  
CAGCTGGTGGAAACCCGGCAGATCACAAAGCACGTGGCACAGATCTGGACTCCCGGATGAACACTAAGTACGACGAGAA  
TGACAAGCTGATCCGGGAAGTGAAGTGAATCACCTGAAGTCCAAGTGGTGTCCGATTTCCGGAAGGATTTCCAGTTTT  
ACAAAGTGCAGGATCAACAACCTACCACCAGCCACGACGCTTACCTGAACGCCGTCGTGGGAACCGCCTGATCAAAA  
AAGTACCCTGCGCTGGAAAGCGAGTTCGTGTACGGCGACTACAAGGTGACGAGTGCAGGAGATGATCGCAAGAGCGA  
GCAGGAAATCGGCAAGGCTACCGCCAAGTACTTCTTCTACAGCAACATCATGAACTTTTTCAAGACCGAGATTACCCTGG  
CCAACGGCGAGATCCGGAAGGCCCTCTGATCGAGACAACCGCGAAACCGGGGAGATCGTGTGGGATAAGGGCCGGGAT  
TTTGGCACCGTGCAGAAAGTGTGAGCATGCCCAAGTGAATATCGTGAAGAAAGACCGAGGTGCAGACAGGCGGCTTCAG  
CAAGAGCTATCTGCCAAGAGGAACAGCGATAAGTGTGATCGCCAGAAAGAAAGACTGGGACCTTAAAGAGTACGGCG  
GCTTCGACAGCCCCACCTGAGCTTCTGTGTTGTTGCTGGCCAAAGTGGAAAAGGGCAAGTCCAAGAAACTGGAAGT  
GTGAAAGAGCTGCTGGGGATACCATCATGGAAGAAGCAGCTTCGAGAAGAATCCCATCGACTTCTGGAAGCCAAGGG  
CTACAAAGAAGTGAAGAAAGGACCTGATCATCAAGCTGCCAAGTACTCCCTGTTCCGAGCTGGAAAACGGCCGAAGAGAA  
TGCTGGCCTCTGCCGGCAACTGCAGAAGGGAAACGAACTGGCCCTGCCCTCCAAATATGTGAACCTTCTGTACCTGGCC  
AGCCACTATGAGAAGTGAAGGGCTCCCCGAGGATAATGAGCAGAAACAGCTGTTTTGTGAACAGCACAAAGCACTACCT  
GGACGAGATCATCGAGCAGATCAGCGAGTTCTCCAAGAGAGTGTCTGGCCGACGCTAATCTGGACAAAGTGTGTCCG  
CTTACAACAAGCACCGGGATAAGCCATCAGAGAGCAGGCCGAGAATATCATCCACCTGTTTACCCTGACCAATCTGGGA  
GCCCTGCCGCCTTCAAGTACTTTGACACCACCATCGACCGGAAGAGGTACACCAGCACCAAGAAGGTGCTGGACGCCAC

CCTGATCCACCAGAGCATCACCGGCCTGTACGAGACACGGATCGACCTGTCTCAGCTGGGAGGCGACAAAAGGCCGGCGG  
CCACGAAAAAGGCCGCGCCAGGCAAAAAAGAAAAGGCTAGCGGCTCCCCAAGAAAAACGCAAGGTGGAAGATCCTAAG  
AAAAAGCGGAAAGTGAAGAATTCCTGCAGGACGCGTGGAAATTCCTCCTCAGGTGCAGGCTGCCTATCAGAAGGTGG  
TGGCTGGTGTGGCCAATGCCCTGGCTCACAAATACCACTGAGATCTTTTTCCCTCTGCCAAAAATTATGGGGACATCATG  
AAGCCCCTTGAGCATCTGACTTCTGGCTAATAAAGGAAATTTATTTTCATTGCAATAGTGTGTTGGAATTTTTTGTGTCT  
CTCACTCGGAAGGACATATGGGAGGGCAAATCATTAAAAACATCAGAATGAGTATTTGGTTTAGAGTTTGGCAACATATG  
CCATATGCTGGCTGCCATGAACAAAGGTGGCTATAAAGAGGTCATCAGTATATGAAACAGCCCCCTGCTGTCCATTCCTT  
ATTCCATAGAAAAGCCTTGACTTGAGGTAGATTTTTTTTTATATTTGTTTTGTGTTATTTTTTCTTTAACATCCCTAA  
AATTTTCCTTACATGTTTTACTAGCCAGATTTTTCCCTCCTCTCCTGACTACTCCCAGTCATAGCTGTCCCTCTTCTCTTA  
TGAAGATC
